# Supplementary material for: Aminated mesoporous silica nanoparticles for the removal of low-concentration malodorous aldehyde gases
Source: Royal Society of Chemistry journal article supplement (doi:10.1039/c8en00853a), 2018-01-01

## **Aminated mesoporous silica nanoparticles for removal of low-concentration aldehyde malodorous gases**

*Shengpan Peng<sup>a,b</sup>, Yuzhou Deng<sup>a,b</sup>, Weiman Li<sup>a,b,c</sup>, Jiayuan Chen<sup>a,b</sup>, Haidi Liu<sup>a,c</sup>,*

*Yunfa Chen<sup>a,c,\*</sup>*

<sup>a</sup> State Key Laboratory of Multiphase Complex Systems, Institute of Process  
Engineering, Chinese Academy of Sciences, Beijing 100190, PR China

<sup>b</sup> University of Chinese Academy of Sciences, No. 19A Yuquan Road, Beijing  
100049, PR China

<sup>c</sup> Center for Excellence in Regional Atmospheric Environment, Institute of Urban  
Environment, Chinese Academy of Sciences, Xiamen 361021, PR China

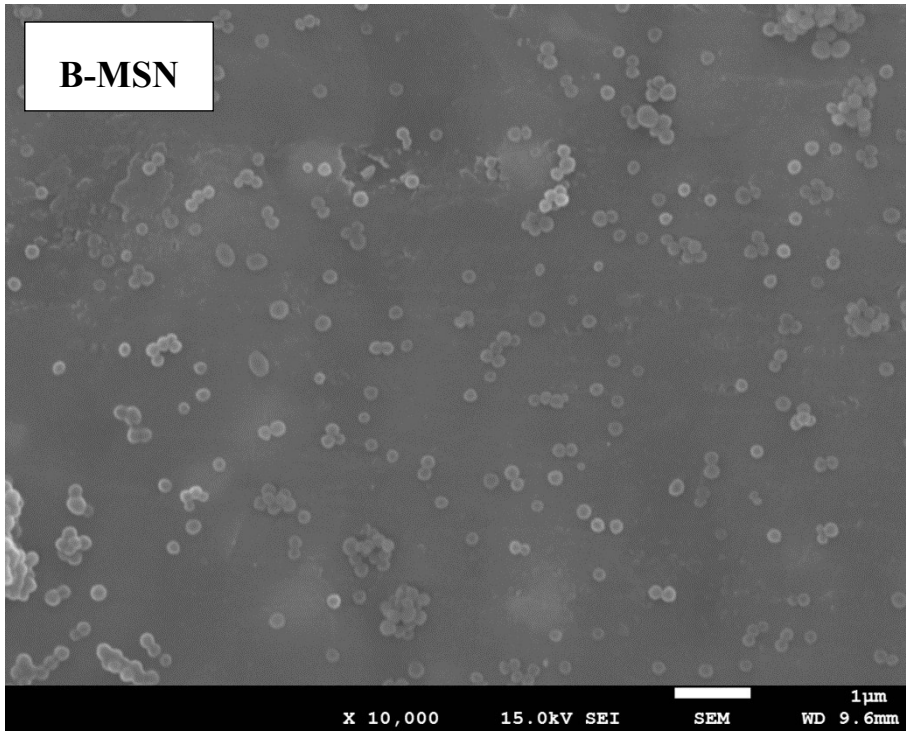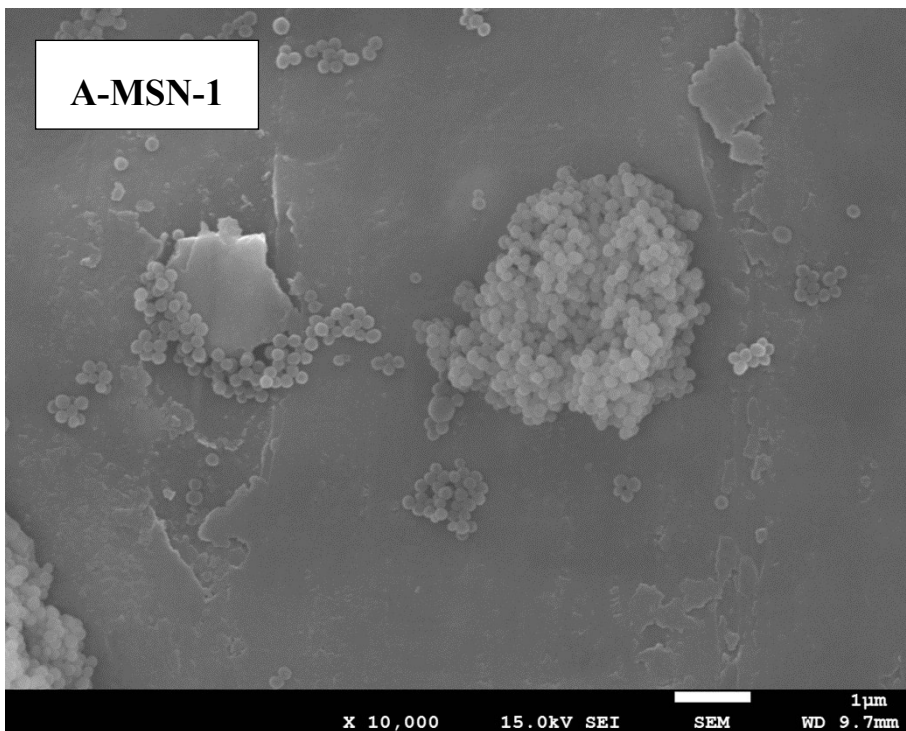

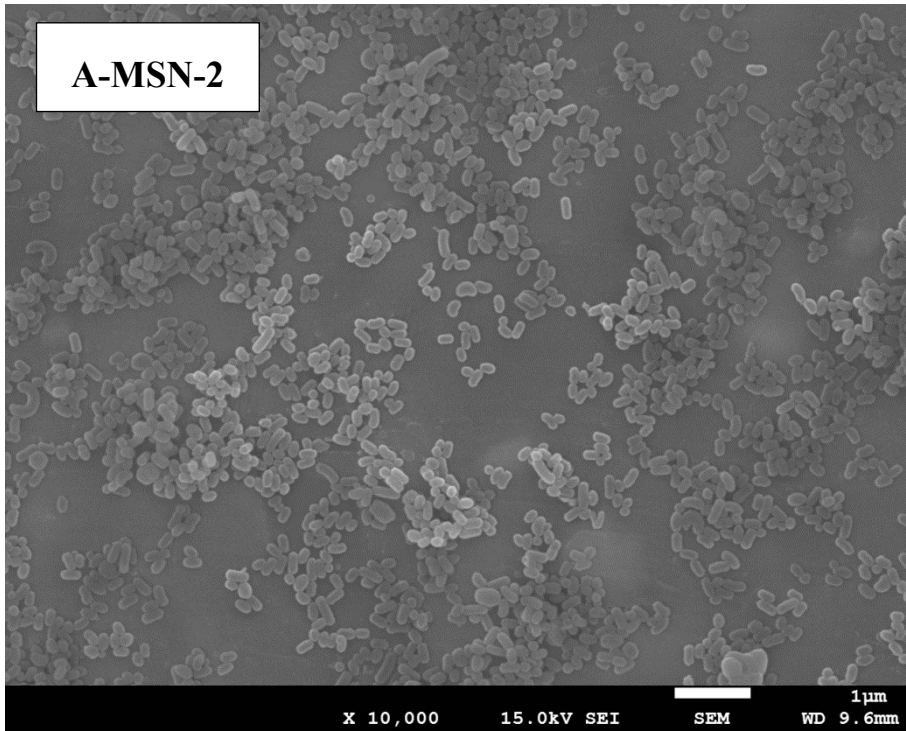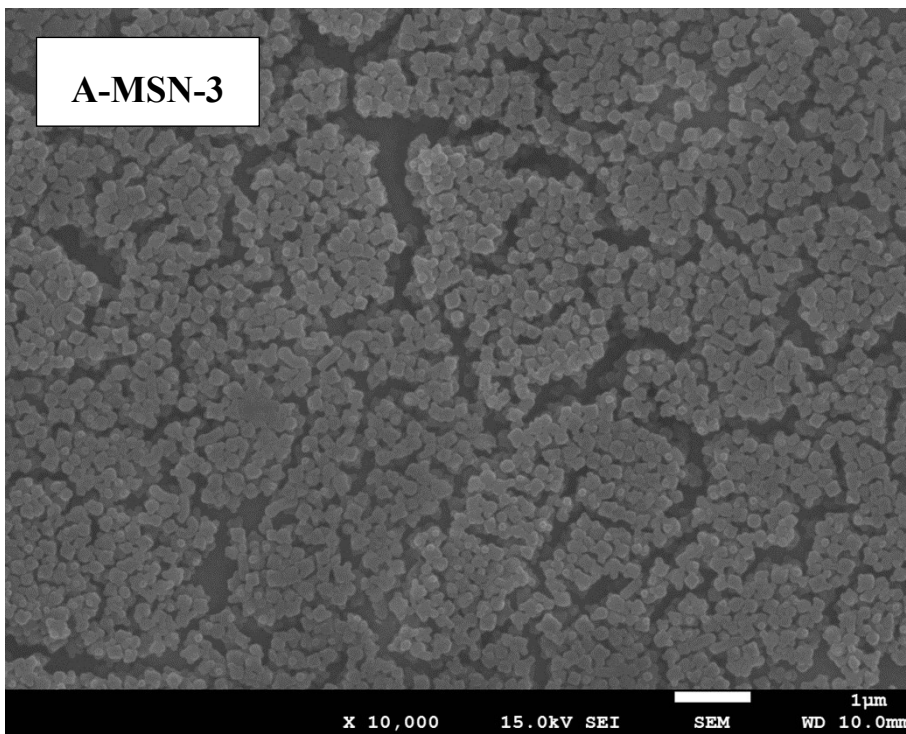

Supplement: c8en00853a1.pdf [file c8en00853a1.pdf]
